# Psychiatric Services

A Journal of the American Psychiatric Association

*Psychiatric Services* (ISSN 1075-2730; online version 1557-9700) is published monthly by the American Psychiatric Association, 800 Maine Ave., S.W., Suite 900, Washington, DC 20024. Copyright © 2018 by the American Psychiatric Association. Printed in U.S.A. Periodicals postage paid at Washington, D.C., and at additional mailing offices. POSTMASTER: Send all address changes to Circulation Department, *Psychiatric Services*, 800 Maine Ave., S.W., Suite 900, Washington, DC 20024.

## Business Information for Readers

### Print Subscriptions

For U.S. members of the American Psychiatric Association (APA), a one-year subscription (12 issues) is \$121. For international APA members, the one-year rate is \$220. Resident-Fellow APA members receive a free subscription as a benefit of membership. For individuals who are not APA members, a one-year subscription is \$162 within the U.S. and \$242 outside the U.S. Discounted two-year subscriptions are also available. To order and for more information, contact Customer Service (800-368-5777 or 202-559-3900; [appi@psych.org](mailto:appi@psych.org)). Individual subscriptions can also be ordered online by visiting the American Psychiatric Association Publishing Web site at [www.appi.org](http://www.appi.org).

Institutional subscriptions are tier priced. For institutional site license information and pricing, contact Customer Service (800-368-5777 or 202-559-3900; [institutions@psych.org](mailto:institutions@psych.org)).

Subscription orders can also be mailed to Customer Service at the American Psychiatric Association, 800 Maine Ave., S.W., Suite 900, Washington, DC 20024. Make checks payable to the American Psychiatric Association.

All subscriptions to the print journal include full-text online access ([ps.psychiatryonline.org](http://ps.psychiatryonline.org)). Use your APP or APA username and password for full-text access (these can be retrieved at [www.psychiatryonline.org](http://www.psychiatryonline.org)). Individual subscribers also have free full-text access to the journal's Legacy Collection (1950–1996).

### Online-Only Subscriptions

APA members, including international members, can purchase an online-only subscription for \$110 per year. For individuals outside the U.S. who are not APA members, a one-year online-only subscription is \$146.

### Address Changes and Subscription Inquiries

For address changes and inquiries about subscription status or billing, contact Customer Service (800-368-5777 or 202-559-

3900; [appi@psych.org](mailto:appi@psych.org)). For faster service, refer to the personal I.D. number located above the name on the mailing label. For address changes, include both the old and the new address. Please give at least six weeks' notice of a change of address to ensure uninterrupted service. Please notify Customer Service of missed issues within two months and allow two to three weeks for delivery.

### Single Issues

Single issues from previous volumes or earlier issues in the current volume are available for purchase from Customer Service. Single issues are \$46 in the U.S. and \$63 outside the U.S.

### Permissions and Reprints

Material published in the journals of the American Psychiatric Association and American Psychiatric Association Publishing is protected by copyright and all rights are reserved. Material may not be reproduced in any form or by any means without written permission from the copyright owner. For permission to reproduce material from American Psychiatric Association and American Psychiatric Association Publishing journals, please visit [www.appi.org/customerservice/pages/Permissions.aspx](http://www.appi.org/customerservice/pages/Permissions.aspx) for more information. Permission can also be secured through the Copyright Clearance Center ([www.copyright.com](http://www.copyright.com)). For bulk reprints, please contact Jane Cha at 202-609-7075; [jcha@psych.org](mailto:jcha@psych.org).

### Advertising

For advertising rates and other information, contact Tim Wolfinger, advertising sales representative, Pharmaceutical Media, Inc., 212-904-0379; [twolfinger@pminy.com](mailto:twolfinger@pminy.com). All ads are subject to editorial approval before publication. APA accepts no responsibility for claims made by advertisers. The acceptance of advertising does not in any way constitute APA endorsement or approval of any advertised service or product.
