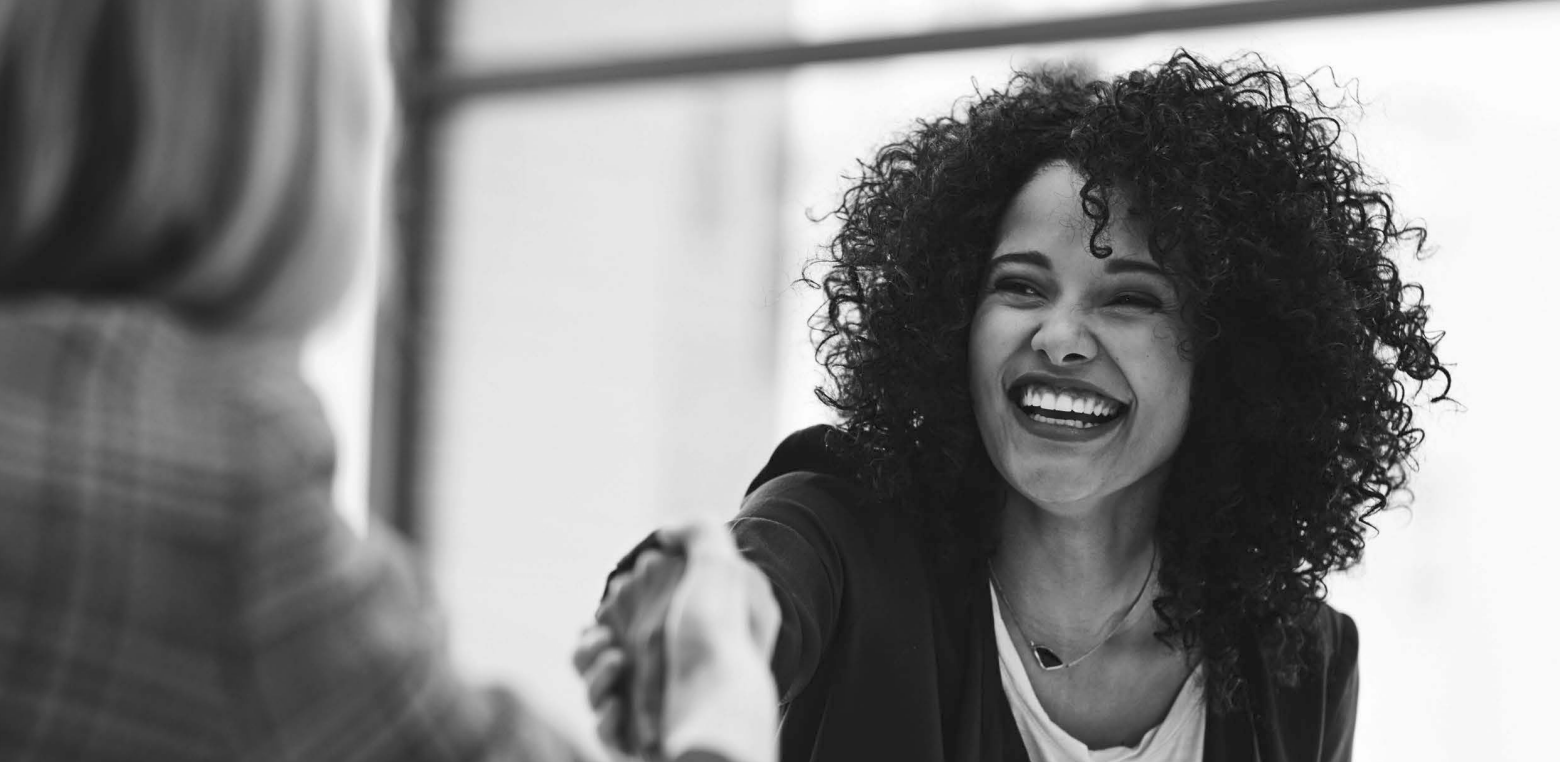

# Searching for the perfect psychiatric career?

## Let APA JobCentral help!

### Manage Your Career

- Browse hundreds of active job listings!
- Create an account to save jobs, store multiple resumes and cover letters and communicate with employers through our internal messaging system.
- Set up multiple job alerts specifying your skills, interests and location to receive e-mails when employers post jobs that match your criteria.

### Recruit for Open Positions

- Post your job in front of thousands of highly qualified psychiatrists.
- Cross promote your job listing in Psychiatric News.
- Search the anonymous resume database to find your ideal candidate.

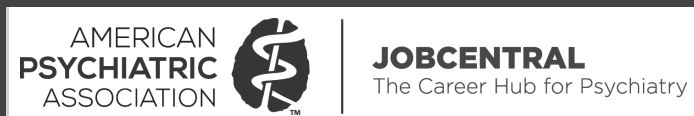

[jobs.psychiatry.org](http://jobs.psychiatry.org)

# American Psychiatric Association Publishing Textbook of Psychopharmacology, Fifth Edition

Edited by Alan F. Schatzberg, M.D., and  
Charles B. Nemeroff, M.D., Ph.D.

The *American Psychiatric Association Publishing Textbook of Psychopharmacology* is an indispensable and comprehensive resource for clinicians and trainees who prescribe psychotropic medications. Updated to reflect the new DSM-5 classification, this revised Fifth Edition maintains the user-friendly structure of its predecessors while offering in-depth coverage of the latest research in pharmacological principles, classes of drugs, and psychiatric disorders.

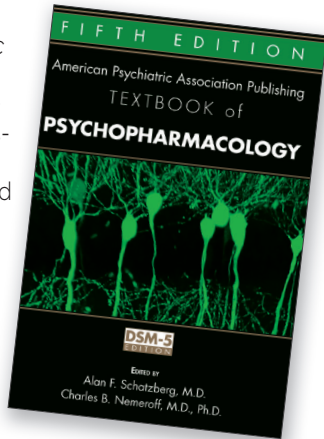

Introductory chapters provide a theoretical grounding in clinical applications, with topics ranging from neurotransmitters to brain imaging in psychopharmacology. The bulk of the book is devoted to various classes of drugs with each class divided into chapters on specific drugs—either new or revised to include the latest findings and trends. Finally, the section on psychopharmacological treatment addresses evidence-based principles of clinical care for the full spectrum of mental disorders and conditions—from depression to chronic pain—as well as for specific populations and circumstances—offering information on topics such as medication selection, combination and maintenance dosing regimens, monitoring and management of side effects, and strategies for optimizing treatment response.

The *American Psychiatric Association Publishing Textbook of Psychopharmacology* provides state-of-the-art information on both the principles and the practice of psychopharmacological treatment of psychiatric disorders.

2017 • 1,823 pages • ISBN 978-1-58562-523-9 • Hardcover • \$299.00 • Item #62523

2017 • 1,823 pages • ISBN 978-1-61537-122-8 • eBook • \$240.00 • Item #37122

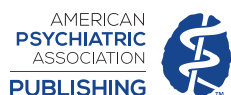

www.appi.org  
Phone: 703-907-7322  
Toll Free: 1-800-368-5777  
Email: appi@psych.org

20% Discount • American Psychiatric Association Members  
25% Discount • APA Resident-Fellow Members

AH1718

# Our Work Matters

Hope. Recovery. Wellbeing.

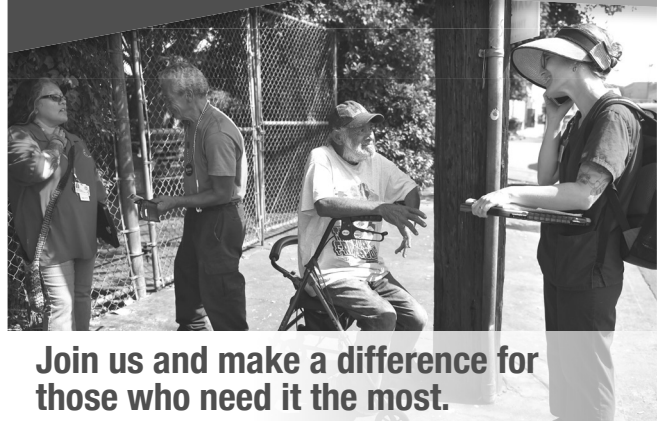

## Join us and make a difference for those who need it the most.

Los Angeles County Department of Mental Health is a nationally recognized leader providing a wide range of services to one of the largest populations in the country. We invite you to join our team as we help the most vulnerable in our community find a path to independence and personal recovery.

Starting annual salary immediately post residency completion is **\$233,784** with **potential bonuses of \$32,000 annually**. Student **loan repayment** and recruitment incentives available.

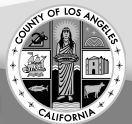

[www.psychiatristjobs.la](http://www.psychiatristjobs.la)

### Job Information

The Department of Psychiatry and Health Behavior at the Medical College of Georgia (MCG) at Augusta University seeks a full-time faculty member to serve as Clinical Director to lead the expansion of the public psychiatry partnership with the Georgia Department of Behavioral Health and Developmental Disabilities. This position will manage medical and clinical care at East Central Regional Hospital-Augusta (ECRH) (located only five miles from the medical school campus), a MCG teaching facility with a 90-bed psychiatric facility, 71 forensic beds and a developmental disabilities facility caring for 200 individuals. Presently there are more than 10 MCG psychiatry and psychology faculty positions at ECRH. These faculty positions enhance teaching throughout the department by expanding the MCG presence and enhancing core didactic and residency practical instruction in psychiatry and psychology.

The Clinical Director position will fulfill the expectations between MCG and GA Department of Behavioral Health and Developmental Disabilities (DBHDD) for psychiatric services to be provided at East Central Regional Hospital (ECRH). The Clinical Director has overall responsibility for assuring high quality care for the patients of ECRH, including coordinating the efforts of the staff physicians, psychologists, and social workers at ECRH, to assure that community health care services are adequate, appropriate and accessible. The Clinical Director oversees, develops and implements related policies and procedures, plans, organizes, directs and coordinates the delivery of health services, monitors and evaluates healthcare programs. The Clinical Director provides leadership to subordinate managers and staff. The Clinical Director sets priorities and implements goals and objectives to meet or resolve identified health problems, and interviews, hires, directs, trains, evaluates the performance of and when necessary, disciplines and discharges health care employees. This position will not be eligible for tenure.

### Minimum Requirements

The Medical College of Georgia, part of Augusta University, seeks a Board-Certified Psychiatrist for the Clinical Director position through an Academic Partnership with 4 years of management/supervisory experience in healthcare. MD, DO, or MBBS required.

### How To Apply

For more details and to apply, qualified applicants must apply online at [https://erecruit.augusta.edu/psp/hrp461/SS/HRSS/c/HRSS\\_HRAM.HRS\\_CE.GBL?Page=HRSS\\_CE\\_JOB\\_DTL&Action=A&SiteId=1&JobOpeningId=11758&PostingSeq=1](https://erecruit.augusta.edu/psp/hrp461/SS/HRSS/c/HRSS_HRAM.HRS_CE.GBL?Page=HRSS_CE_JOB_DTL&Action=A&SiteId=1&JobOpeningId=11758&PostingSeq=1)

Please be sure to upload your Curriculum Vitae, Professional References, etc

# The DSM-5 Collection

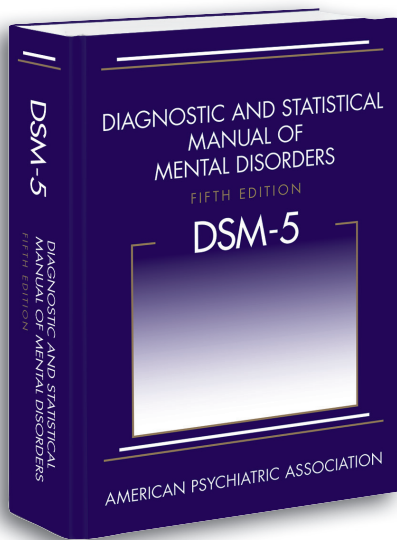

## Diagnostic and Statistical Manual of Mental Disorders, Fifth Edition (DSM-5®)

American Psychiatric Association

This new edition of *Diagnostic and Statistical Manual of Mental Disorders* (DSM-5®), used by clinicians and researchers to diagnose and classify mental disorders, is the product of more than 10 years of effort by hundreds of international experts in all aspects of mental health. Their dedication and hard work have yielded an authoritative volume that defines and classifies mental disorders in order to improve diagnosis, treatment, and research.

The criteria are concise and explicit, intended to facilitate an objective assessment of symptom presentations in a variety of clinical settings—inpatient, outpatient, partial hospital, consultation-liaison, clinical, private practice, and primary care.

- The latest findings in neuroimaging and genetics have been integrated into each disorder along with gender and cultural considerations.
- The revised organizational structure recognizes symptoms that span multiple diagnostic categories, providing new clinical insights in diagnosis.

- Both ICD-9-CM and ICD-10-CM codes are included for each disorder.

The *Diagnostic and Statistical Manual of Mental Disorders*, Fifth Edition, is the most comprehensive, current, and critical resource for clinical practice available to today's mental health professionals.

2013 • 991 pages • ISBN 978-0-89042-554-1 • Hardcover • \$210.00 • Item #2554

2013 • 991 pages • ISBN 978-0-89042-555-8 • Paperback • \$160.00 • Item #2555

2013 • 991 pages • ISBN 978-0-89042-557-2 • eBook • \$128.00 • Item #2557

**DSM-5**  
COLLECTION

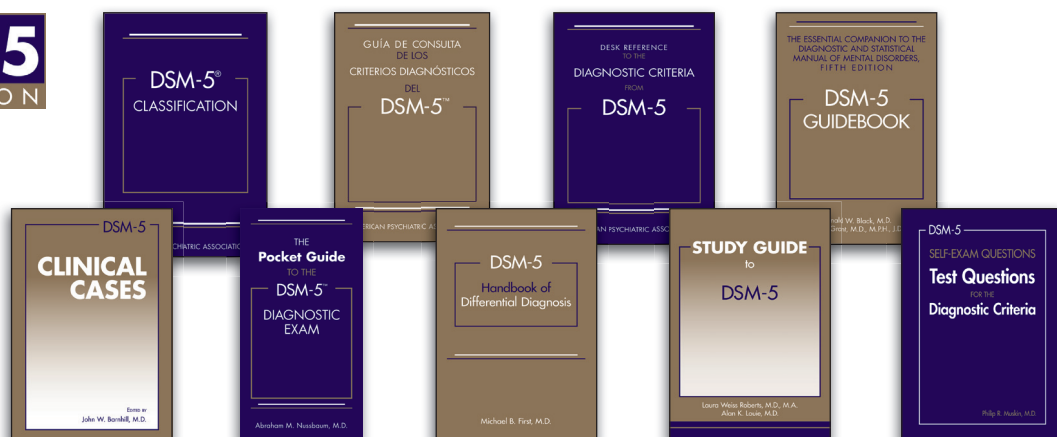

AMERICAN  
PSYCHIATRIC  
ASSOCIATION  
PUBLISHING

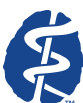

Order Online: [www.appi.org](http://www.appi.org)  
Phone: 703-907-7322  
Toll Free: 1-800-368-5777  
Email: [appi@psych.org](mailto:appi@psych.org)

20% Discount for American Psychiatric  
Association Members

25% Discount for APA Resident-Fellow Members

AH1842A
