# Psychiatric Services

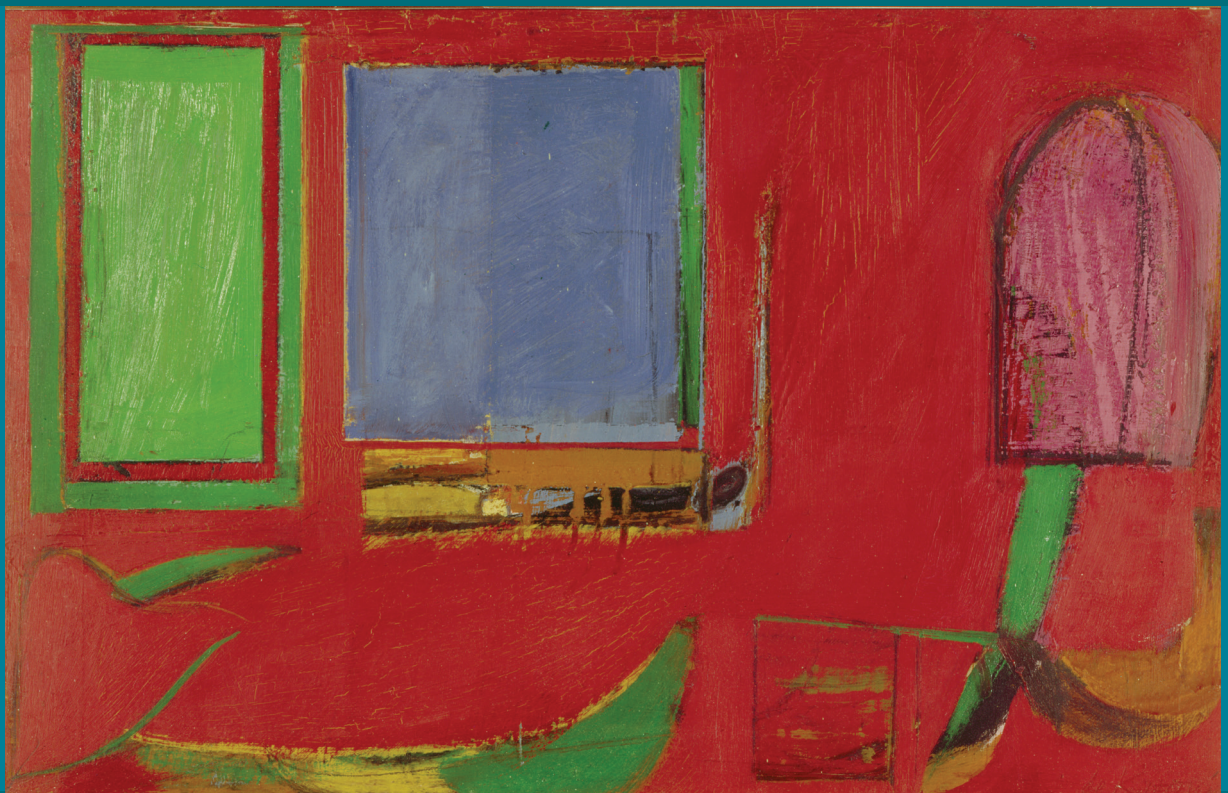

Personal Accounts: An M.D.'s post-op experience with opioids

Serious mental illness and medical marijuana

RCT of coordinated specialty care for first-episode psychosis

Enhanced collaborative care versus colocated treatment for depression
